# Supplementary material
Source: PubMed Central journal article supplement (PMC2740597)

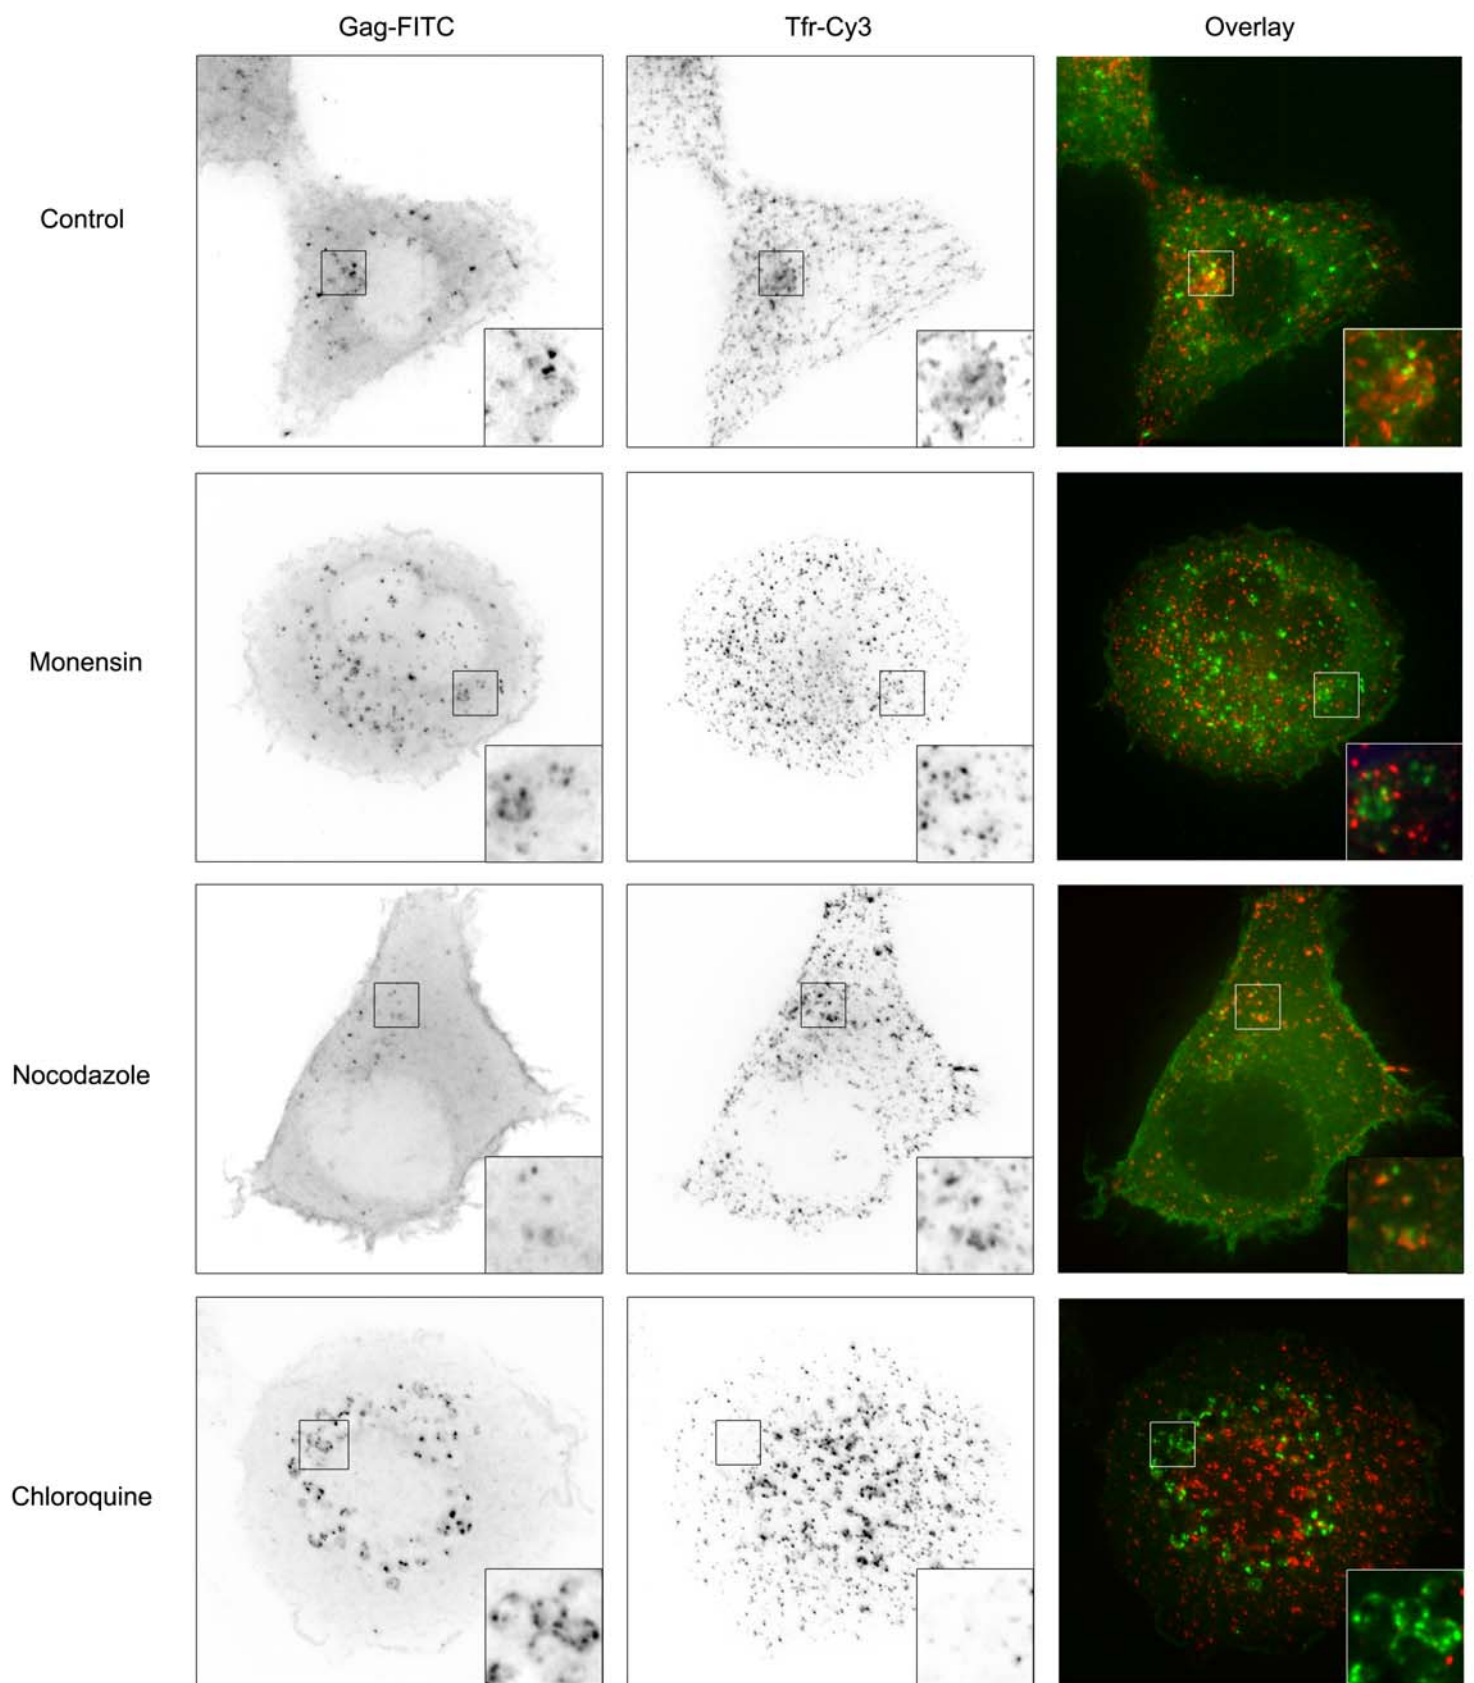

**Sup Fig 1**

HT1080 cells+  
HT\* viral supernatant

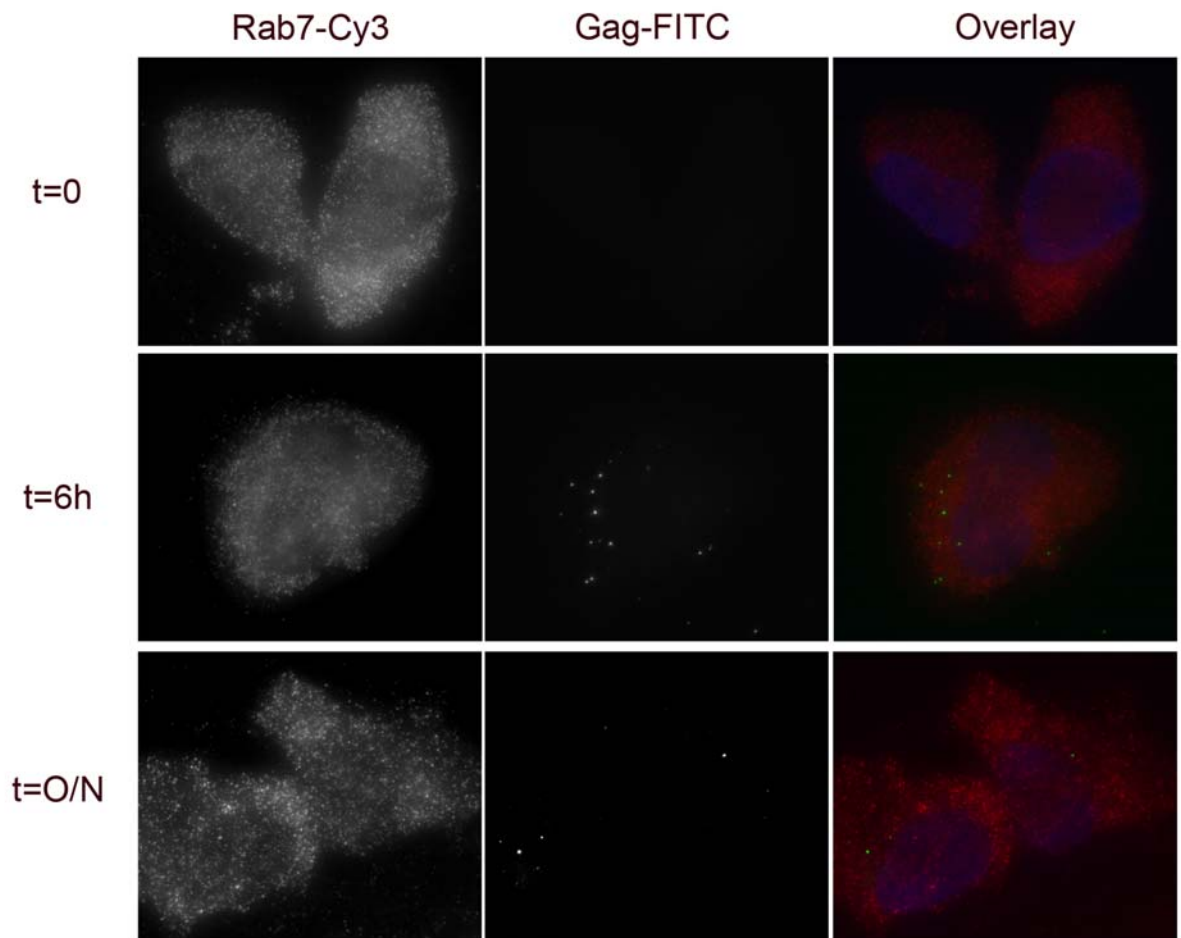

**Sup Fig 2**

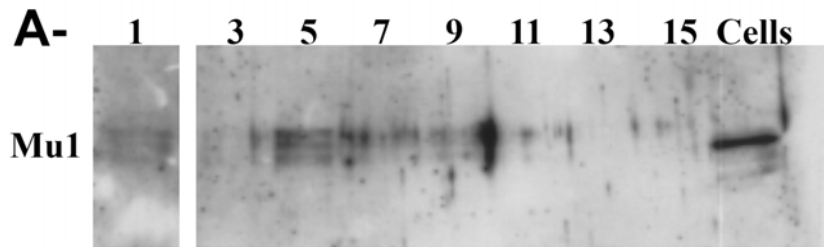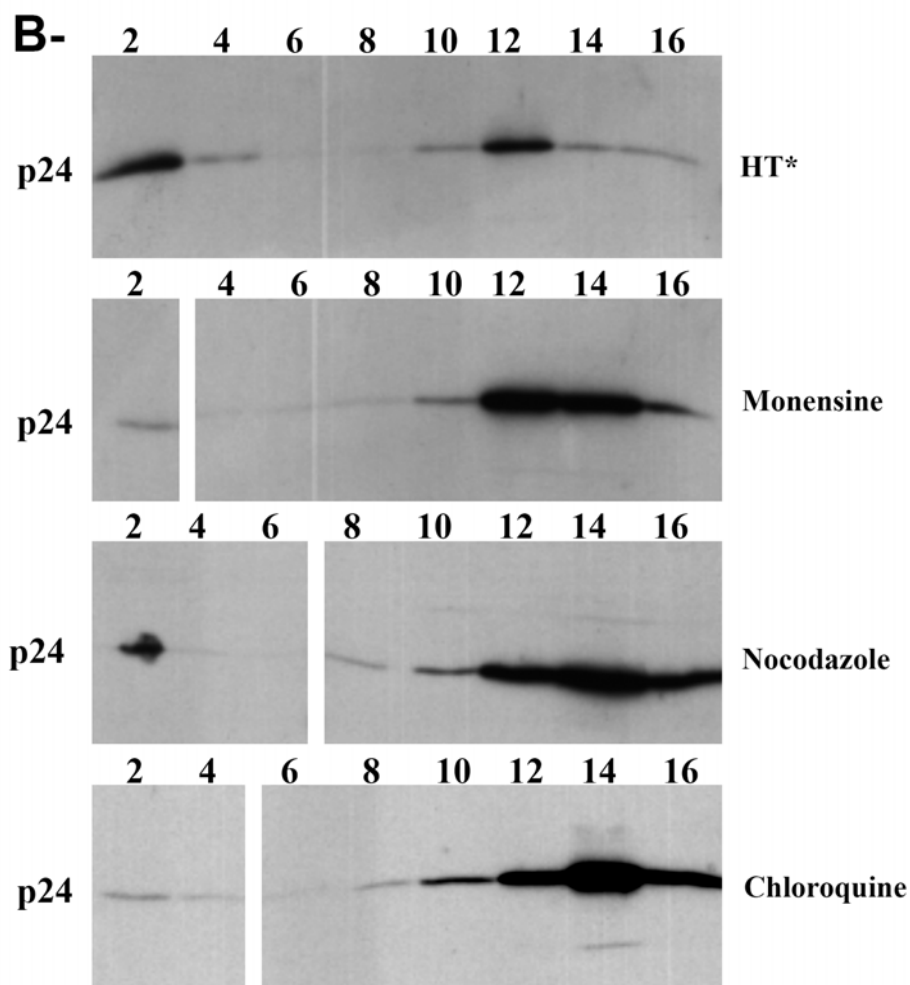

**Sup Fig 3**

Supplement: supp_M109.019844_Supdfigss.pdf [file supp_M109.019844_Supdfigss.pdf]
